# Supplementary material
Source: publisher site journal article supplement (https://www.degruyterbrill.com/publication/isbn/9781683923930/downloadAsset/9781683923930_AUTOCAD%202020%20Beginning%20and%20Intermediate.zip)
Supplement: Supplementary file 1 [file AutoCADTriallink.pdf › AC2020BEGIN/AutoCADTriallink.pdf]

# **AutoCAD® Demo Link**

**1)Visit:**

<http://www.autodesk.com/products/autocad/free-trial>

**2)Click on "DOWNLOAD FREE TRIAL" box**

**3) Join AutoDesk Education Community(see details online)**

Students Can Join the Autodesk Education Community

Benefits include:

- +Use the tools that are helping shape the future of design
- +Get full versions of software
- +No 30-day trial limitation
- +Access training
- +Share your designs and view portfolios

**4)Download demo version (32 bit or 64 bit) or MAC**
