# Supplementary material
Source: publisher site journal article supplement (https://www.degruyterbrill.com/publication/isbn/9781683923930/downloadAsset/9781683923930_AUTOCAD%202020%20Beginning%20and%20Intermediate.zip)
Supplement: Supplementary file 3 [file Building-B.pdf › AC2020BEGIN/Practices andProjects/Chapter 25/Building-B.pdf]

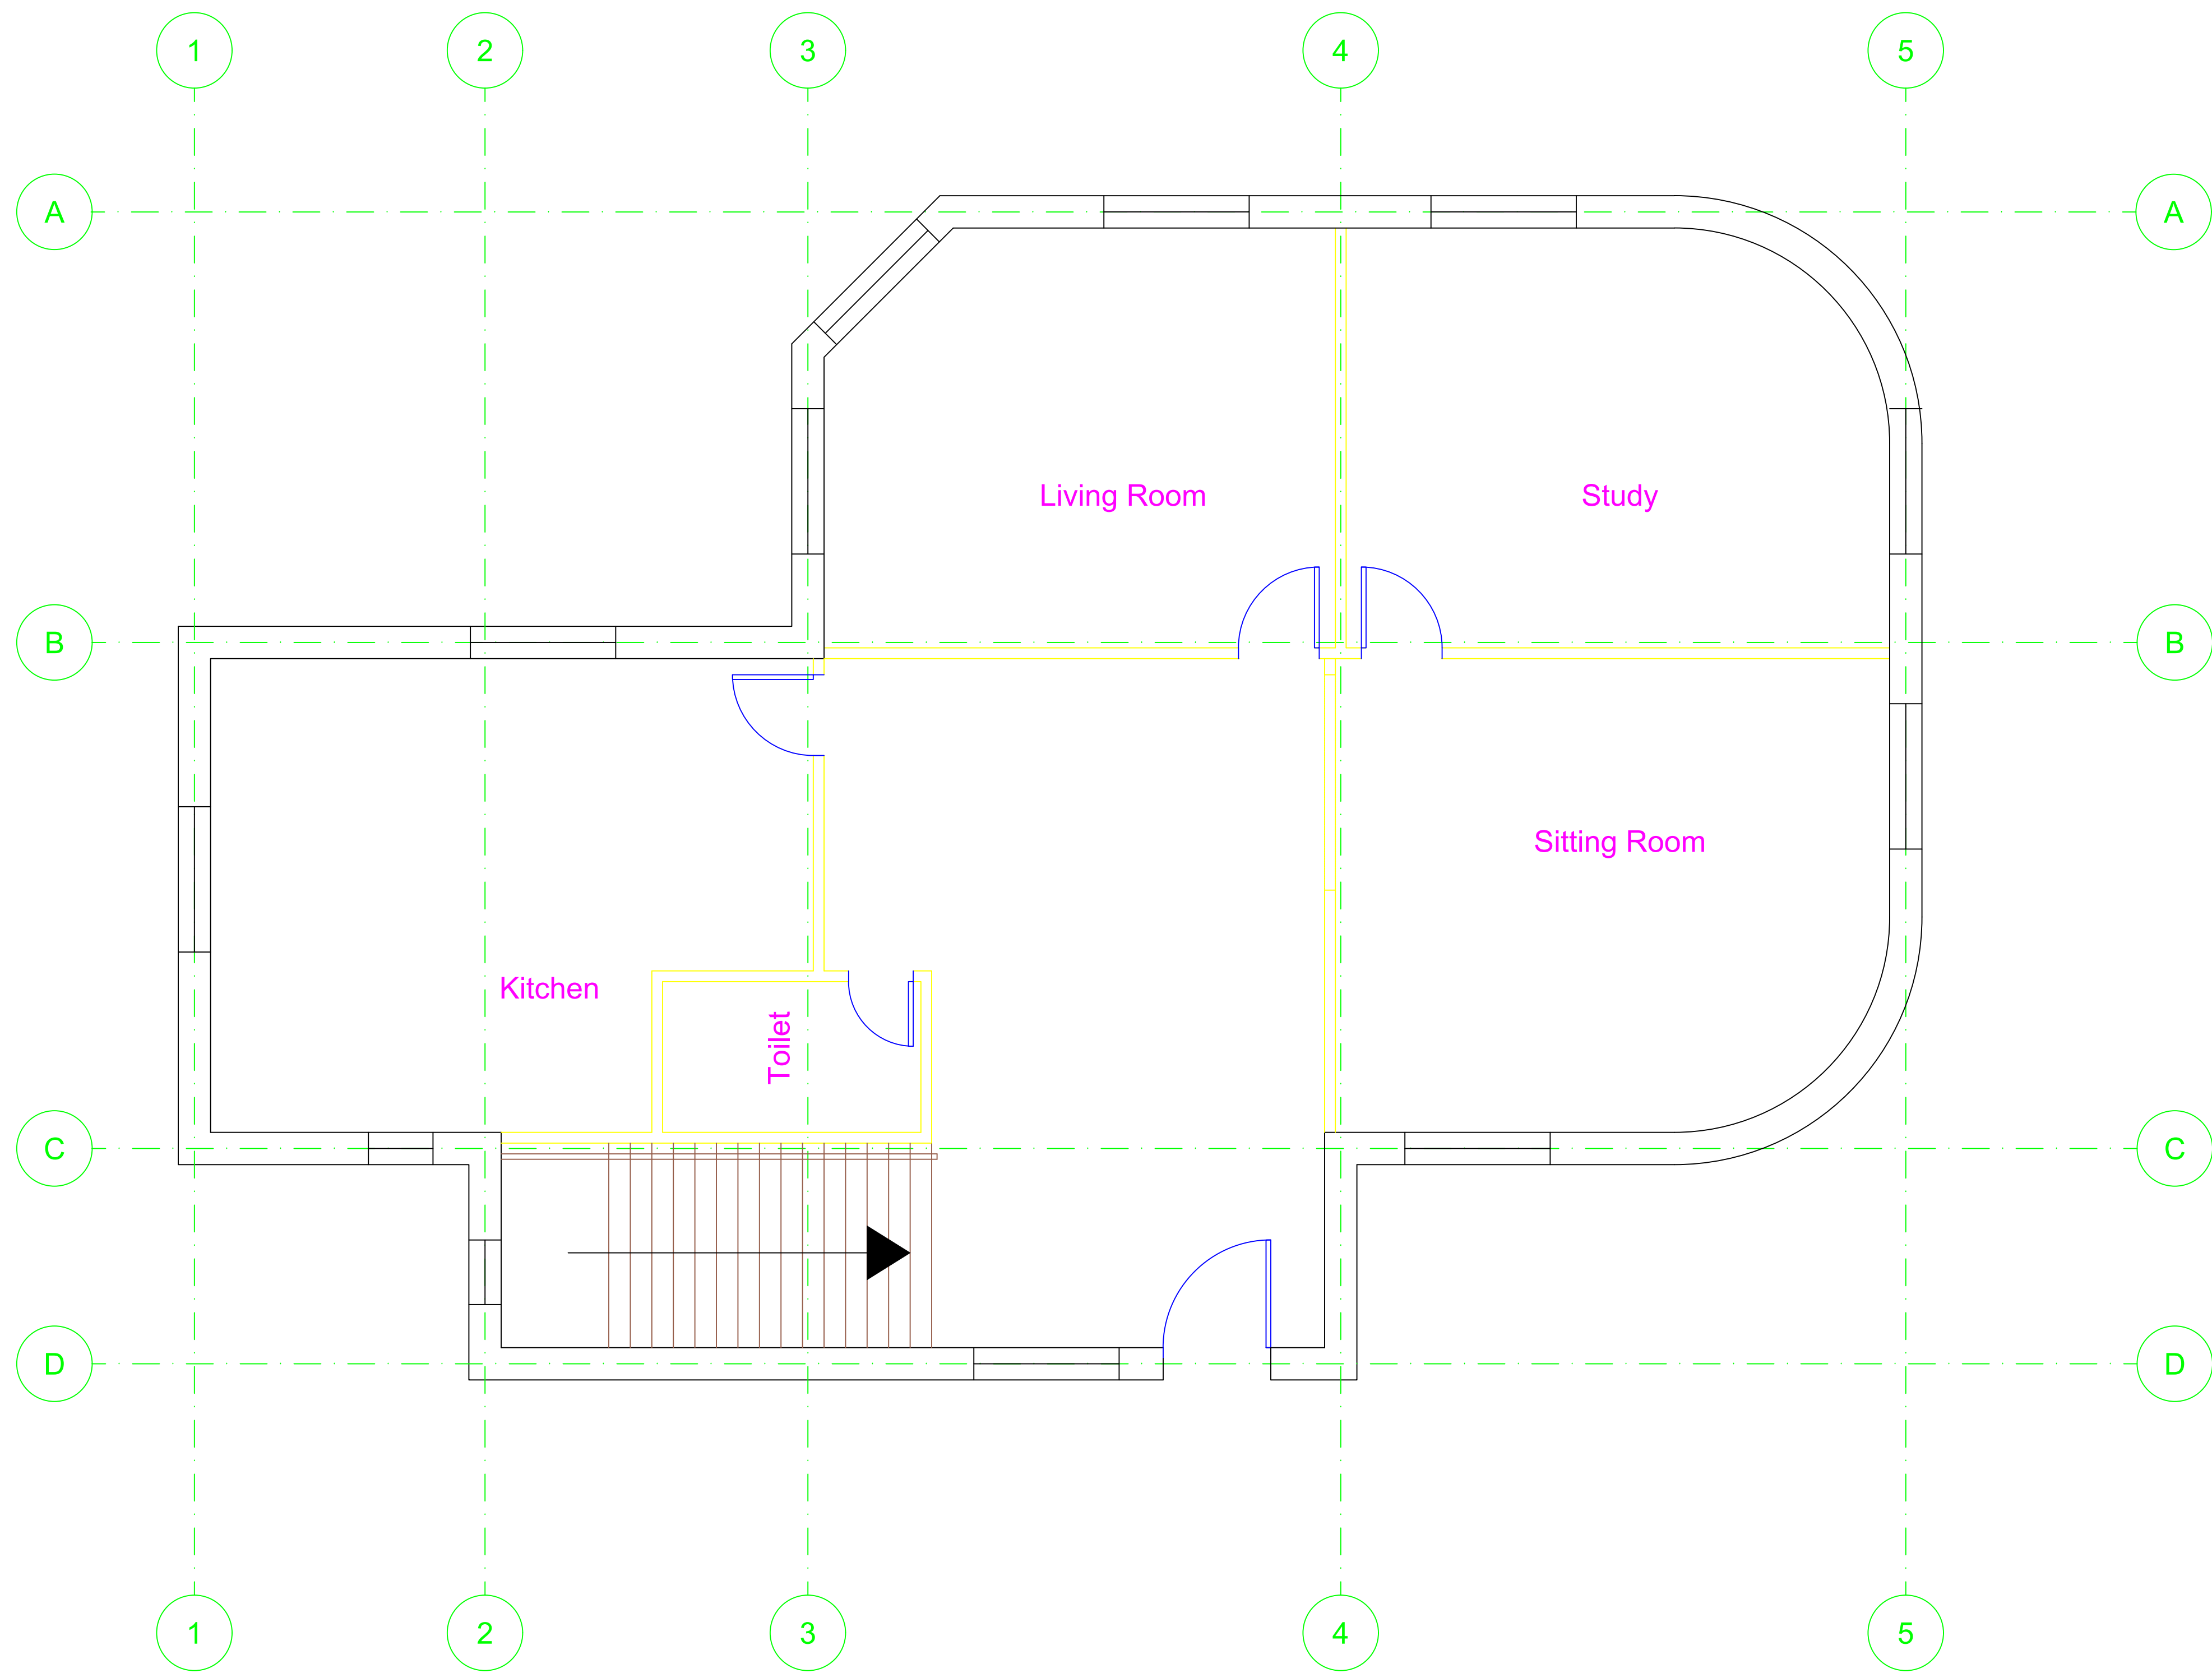

General Notes

|     |                |      |
|-----|----------------|------|
|     |                |      |
| No. | Revision/Issue | Date |

Firm Name and Address

Project Name and Address

Project

Date

Scale

Sheet
