# Supplementary material
Source: publisher site journal article supplement (https://www.degruyterbrill.com/publication/isbn/9781683923930/downloadAsset/9781683923930_AUTOCAD%202020%20Beginning%20and%20Intermediate.zip)
Supplement: Supplementary file 5 [file Architectural_Plans.pdf › AC2020BEGIN/Solved Practices/Chapter 17/Architectural_Plans.pdf]

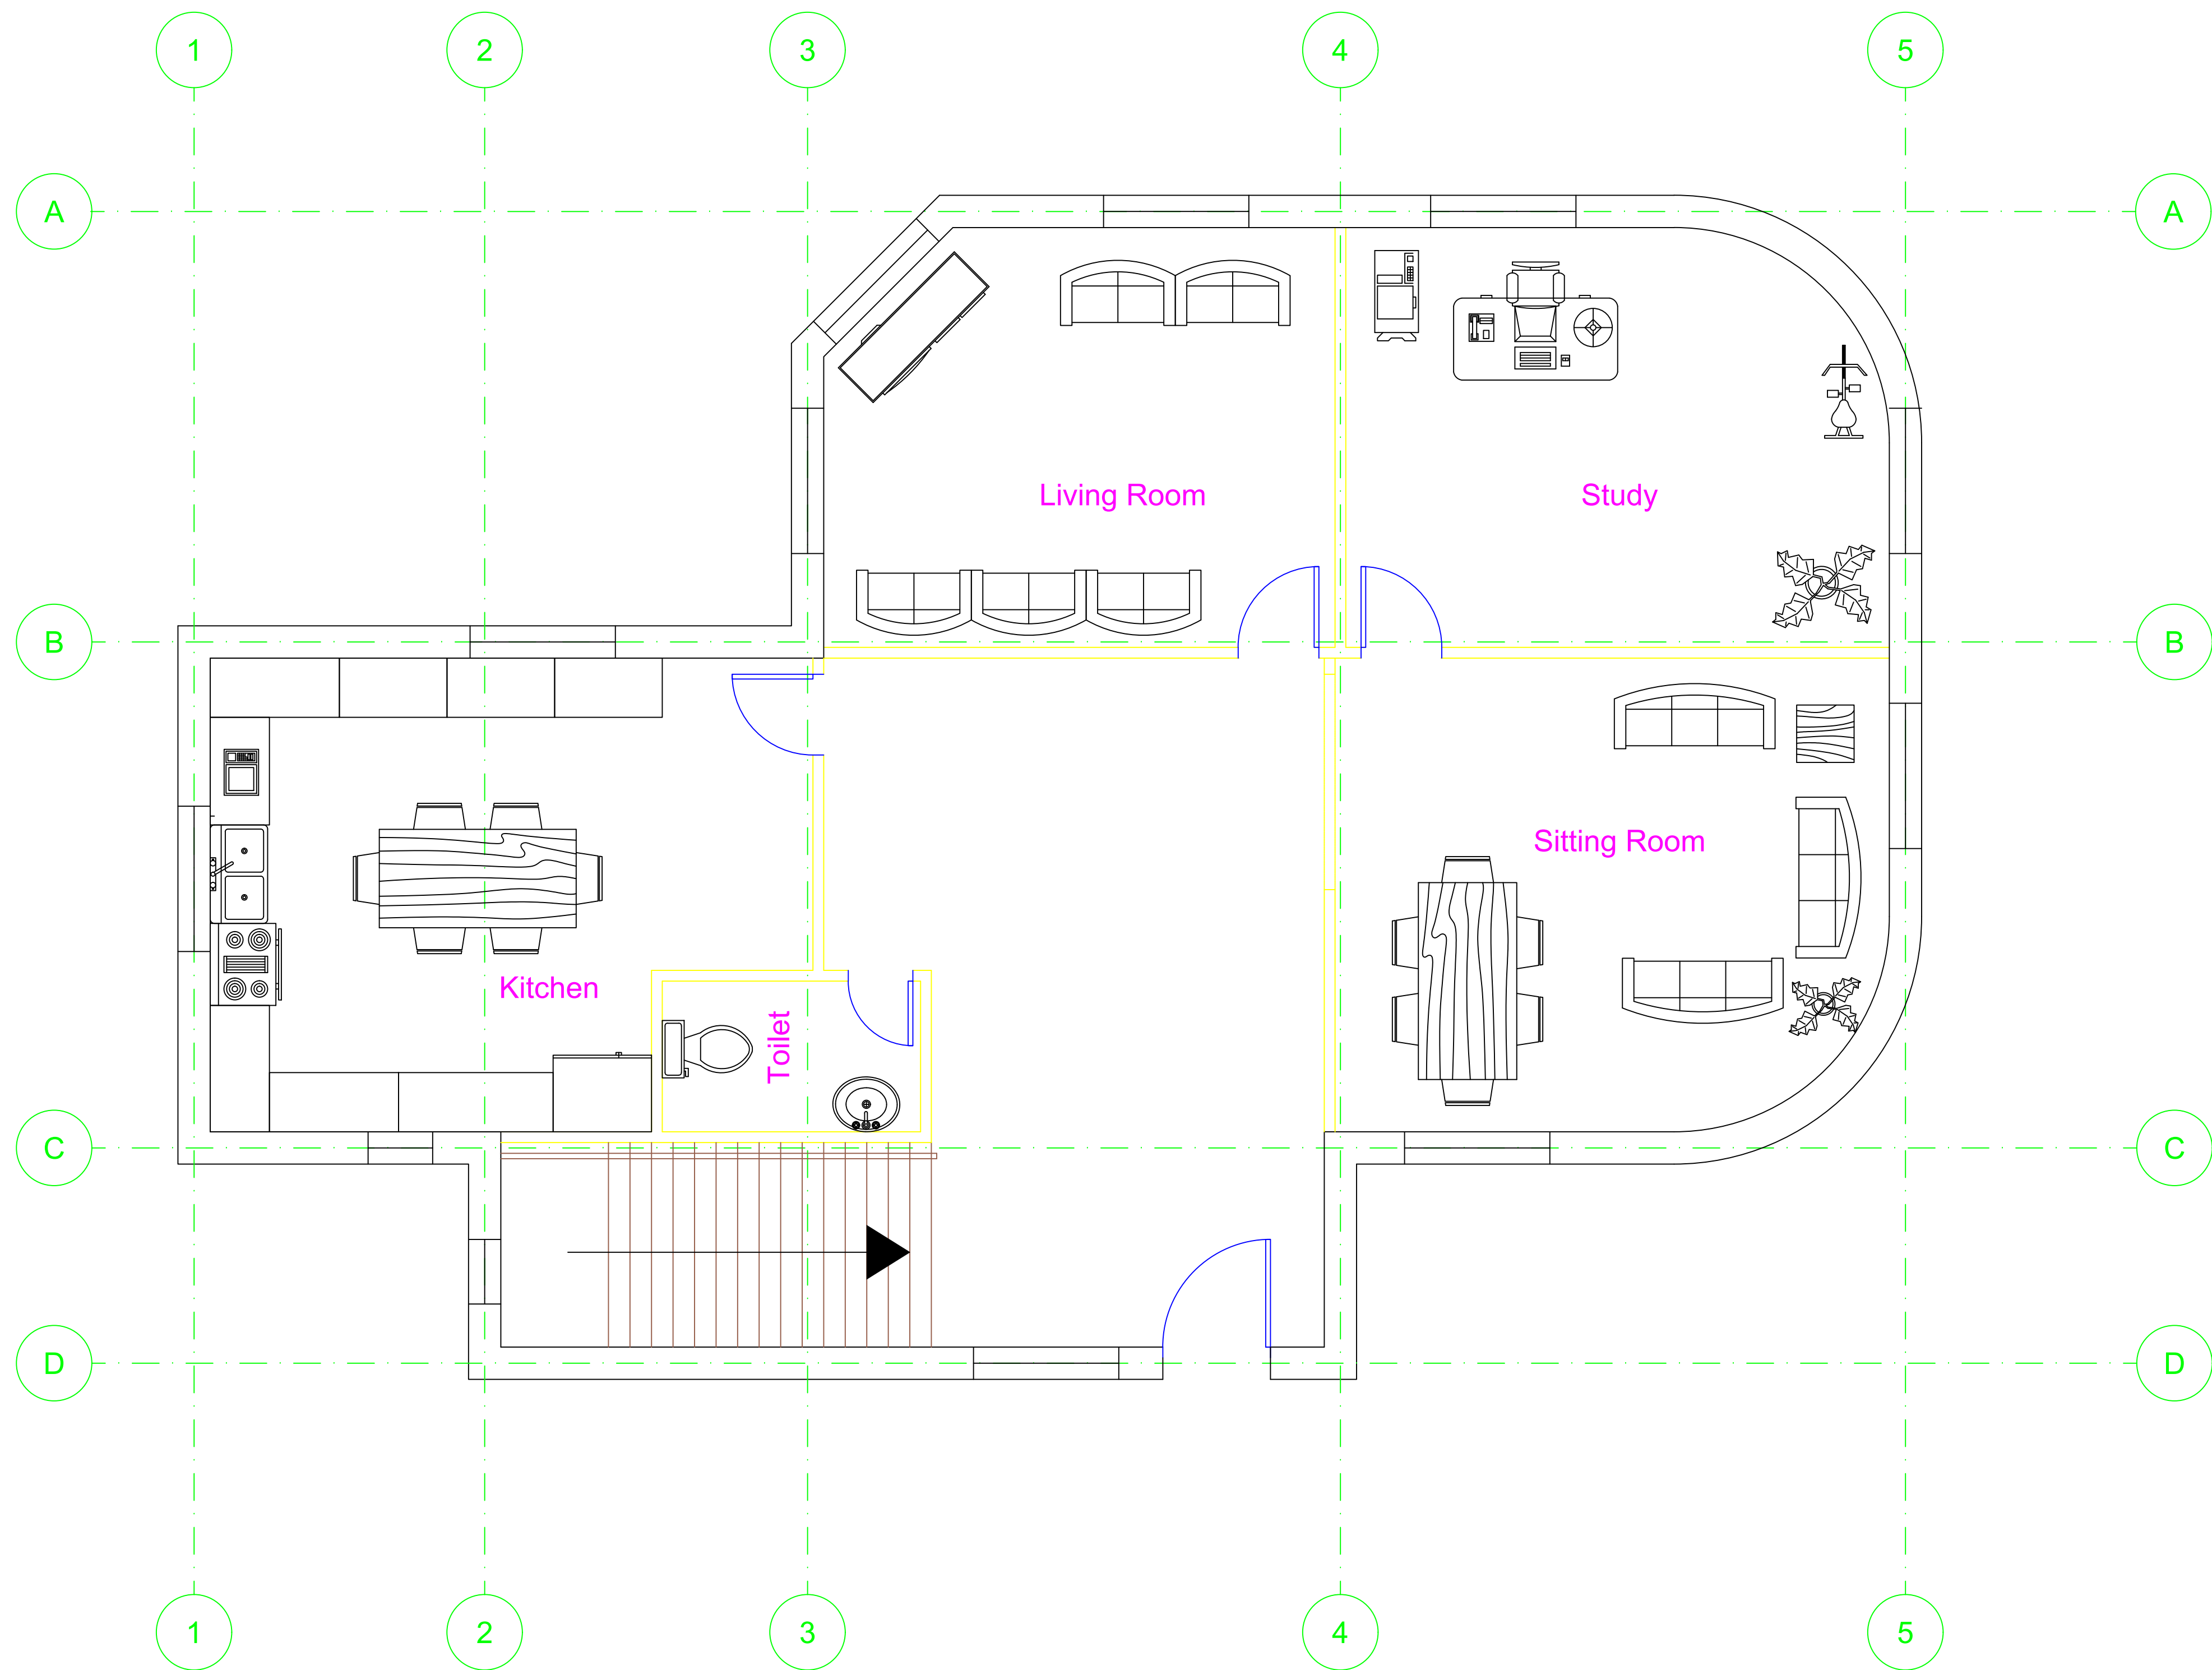

General Notes

|     |                |      |
|-----|----------------|------|
|     |                |      |
| No. | Revision/Issue | Date |

Firm Name and Address

Project Name and Address

|         |       |
|---------|-------|
| Project | Sheet |
| Date    |       |
| Scale   |       |



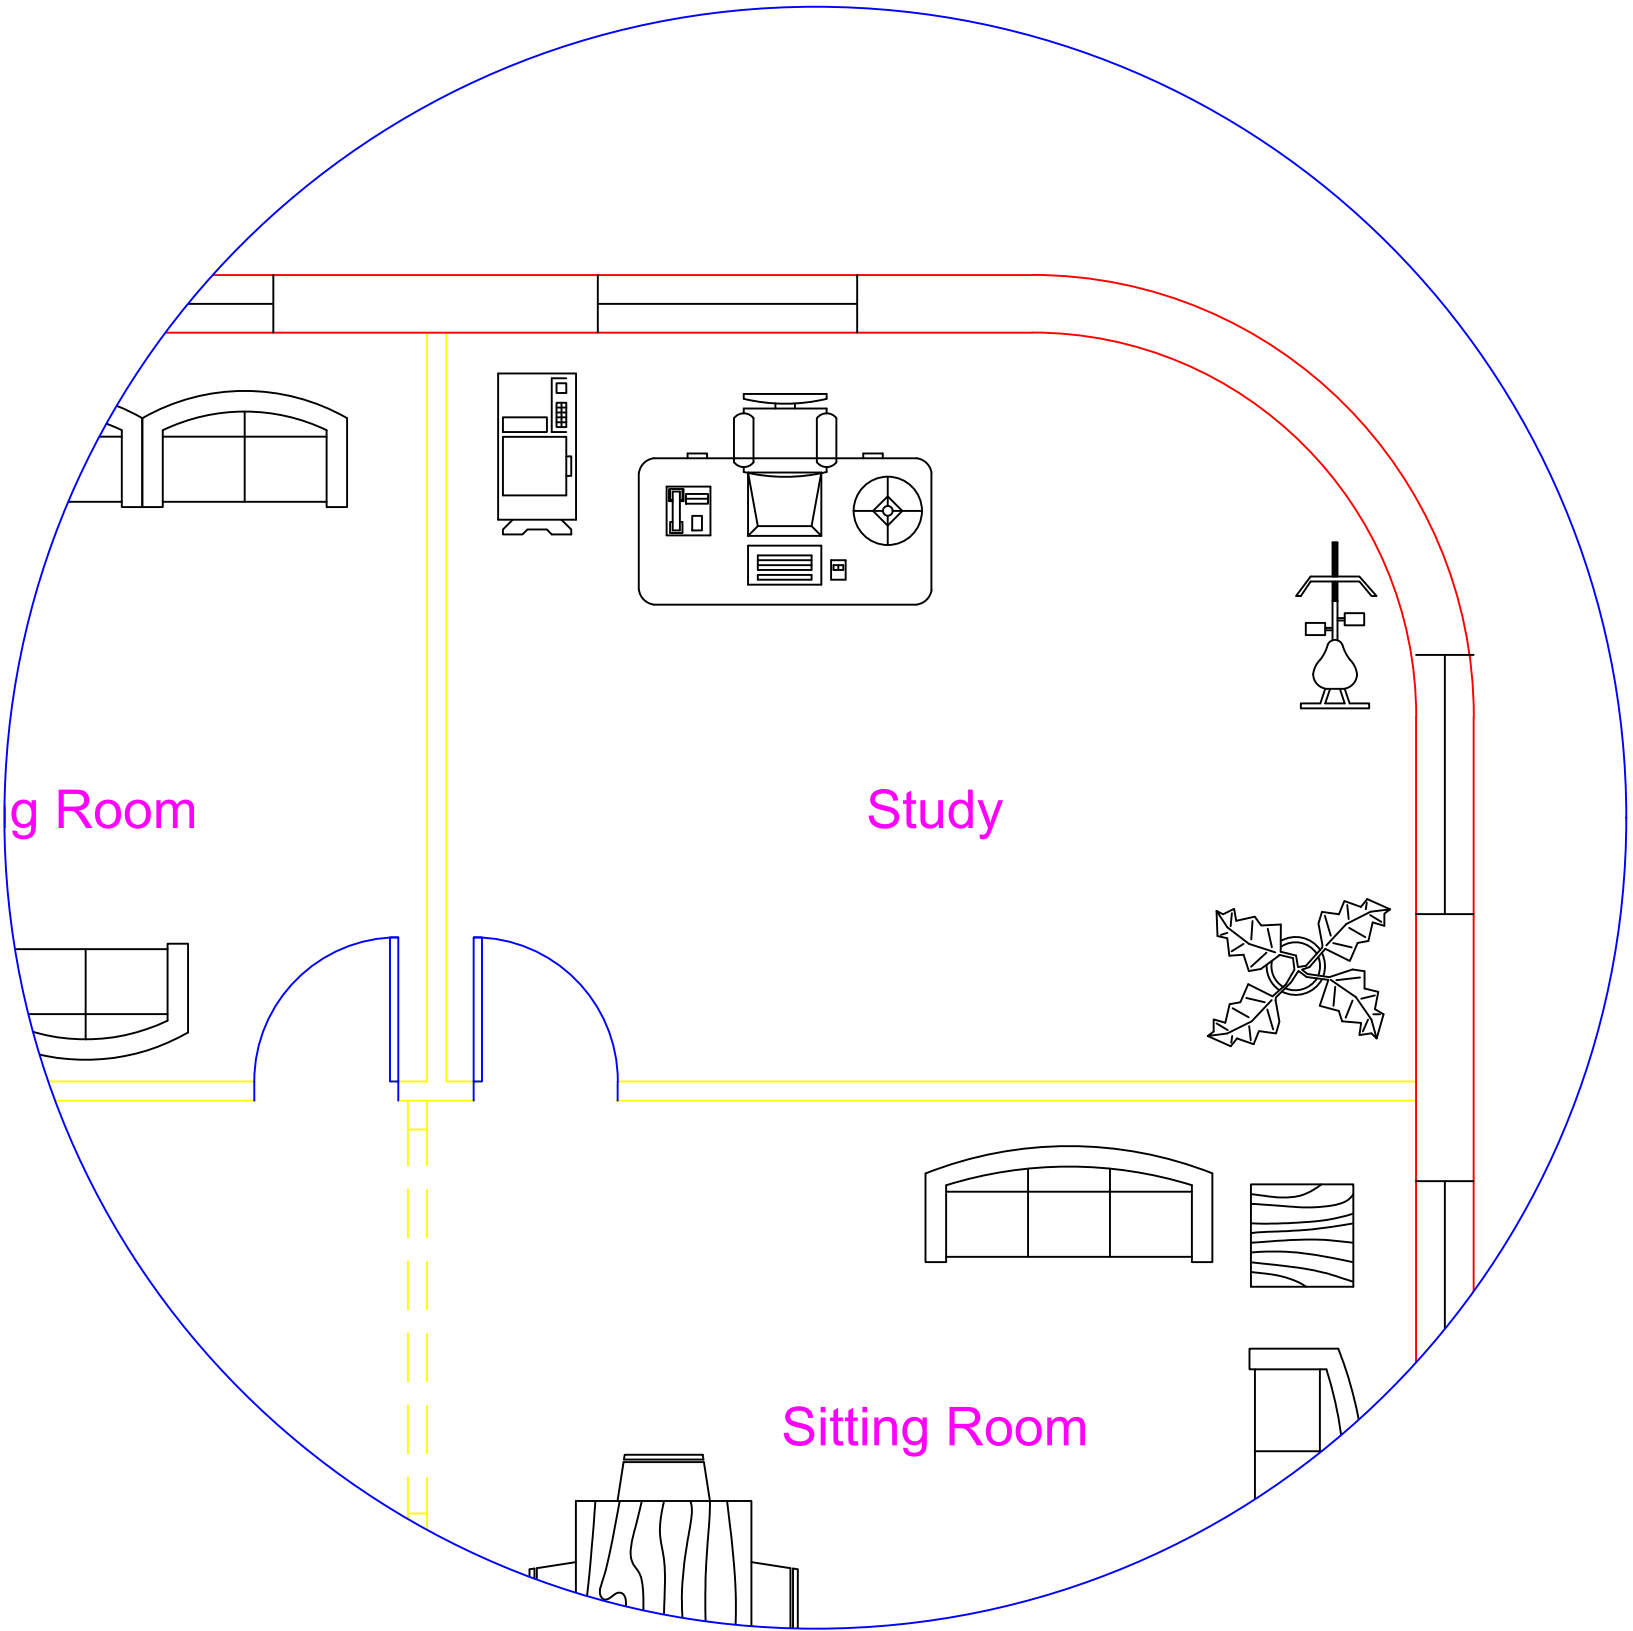

g Room

Study

Sitting Room

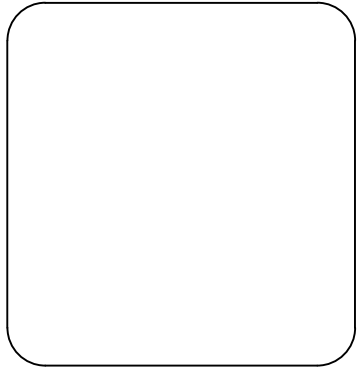

|              |      |                |      |
|--------------|------|----------------|------|
| Project Name |      | XXX XXXXX XXXX |      |
| Sheet Name   | XXXX | Sheet Number   | XXXX |
| Designed By  |      | XXX XXXXX XXXX |      |
| Checked By   | XXXX | Approved By    | XXXX |
| Scale:       |      | XXXX           |      |
