# Supplementary material
Source: publisher site journal article supplement (https://www.degruyterbrill.com/publication/isbn/9781683923930/downloadAsset/9781683923930_AUTOCAD%202020%20Beginning%20and%20Intermediate.zip)

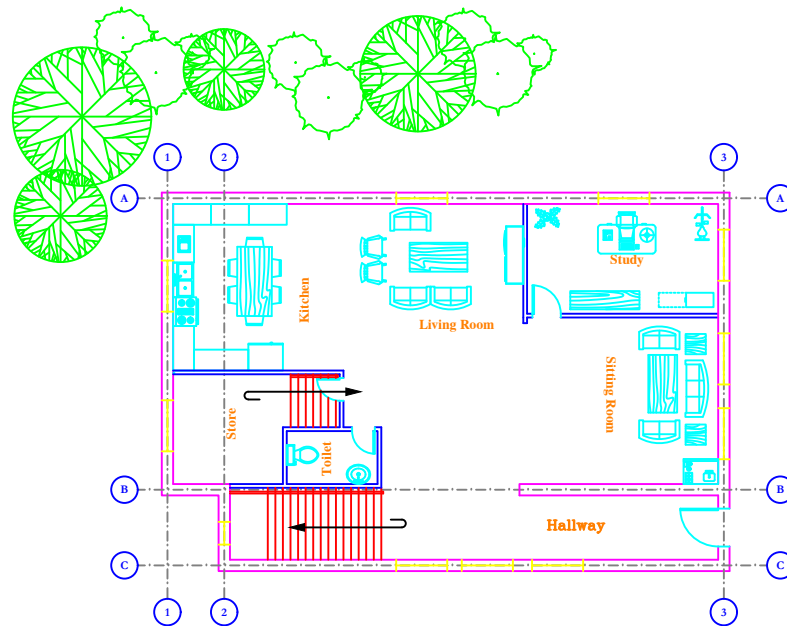

Supplement: Supplementary file 2 [file Building-A.pdf › AC2020BEGIN/Practices andProjects/Chapter 25/Building-A.pdf]
